# Supplementary material for: Heterogeneous Fenton-like degradation of phenanthrene catalyzed by schwertmannite biosynthesized using Acidithiobacillus ferrooxidans
Source: Royal Society of Chemistry journal article supplement (doi:10.1039/c7ra02713c), 2017-01-01
Supplement: c7ra02713c1.pdf [file c7ra02713c1.pdf]

Supplementary information for

## Heterogeneous Fenton-like Degradation of Phenanthrene Catalyzed by Schwertmannite Biosynthesized Using *Acidithiobacillus ferrooxidans*

Xiaoqing Meng<sup>a</sup>, Su Yan<sup>a</sup>, Wenzhu Wu<sup>c</sup>, Guanyu Zheng<sup>a,b\*</sup>, Lixiang Zhou<sup>a,b</sup>

<sup>a</sup>*Department of Environmental Engineering, College of Resources and Environmental Sciences, Nanjing Agricultural University, Nanjing 210095, China*

<sup>b</sup>*Jiangsu Collaborative Innovation Center for Solid Organic Waste Resource Utilization, Nanjing 210095, China*

<sup>c</sup>*Nanjing Institute of Environmental Science, Ministry of Environmental Protection of PRC, Nanjing 210042, China*

*\*Corresponding author. Tel./fax: +86 25 84395160.*

*E-mail address: gyzheng@njau.edu.cn (G. Zheng)*

This supporting information contains a 7-page document, including the detailed descriptions of the preparation of chemosynthetic schwertmannite and chemosynthetic goethite, 4 figures, 1 tables and this cover page.

**Text S1.** Preparation of chemosynthetic schwertmannite and chemosynthetic goethite

Chemosynthetic schwertmannite was prepared using the chemically oxidative synthesis method. Briefly, 1.80 mL of 30% (v/v) H<sub>2</sub>O<sub>2</sub> was added into 150 mL of 160 mmol/L FeSO<sub>4</sub>·7H<sub>2</sub>O solution. The flasks were then incubated for 24 h at 180 rpm and 28 °C in a rotary shaker. Then the precipitates formed in the flasks were collected through filtering with Whatman No. 4 filter paper and dried at 50°C to a constant weight. Chemosynthetic goethite was prepared in the laboratory according to the followed method. Firstly, the pH of a 0.2 M Fe(NO<sub>3</sub>)<sub>3</sub> solution was adjusted to 11.0 with 0.2 M NaOH and then incubated at 180 rpm and 22°C for 48 h in a rotary shaker. After heating in a water bath at 90 °C for 16 h followed by repeated rinsing of the solids with deionized water, the solids were dried for 16 h at 70 °C to a constant weight.

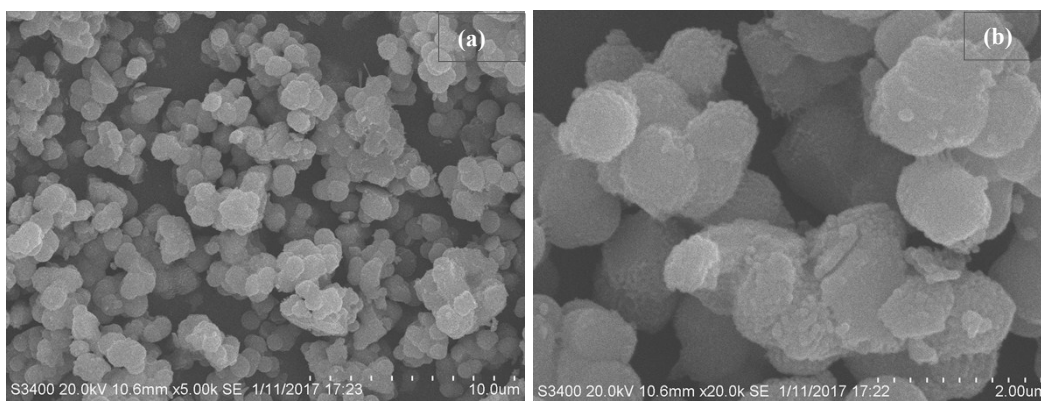

**Fig. S1** SEM images of the chemosynthetic schwertmannite particles:  $\times 2000$  (a) and  $\times 20000$  (b).

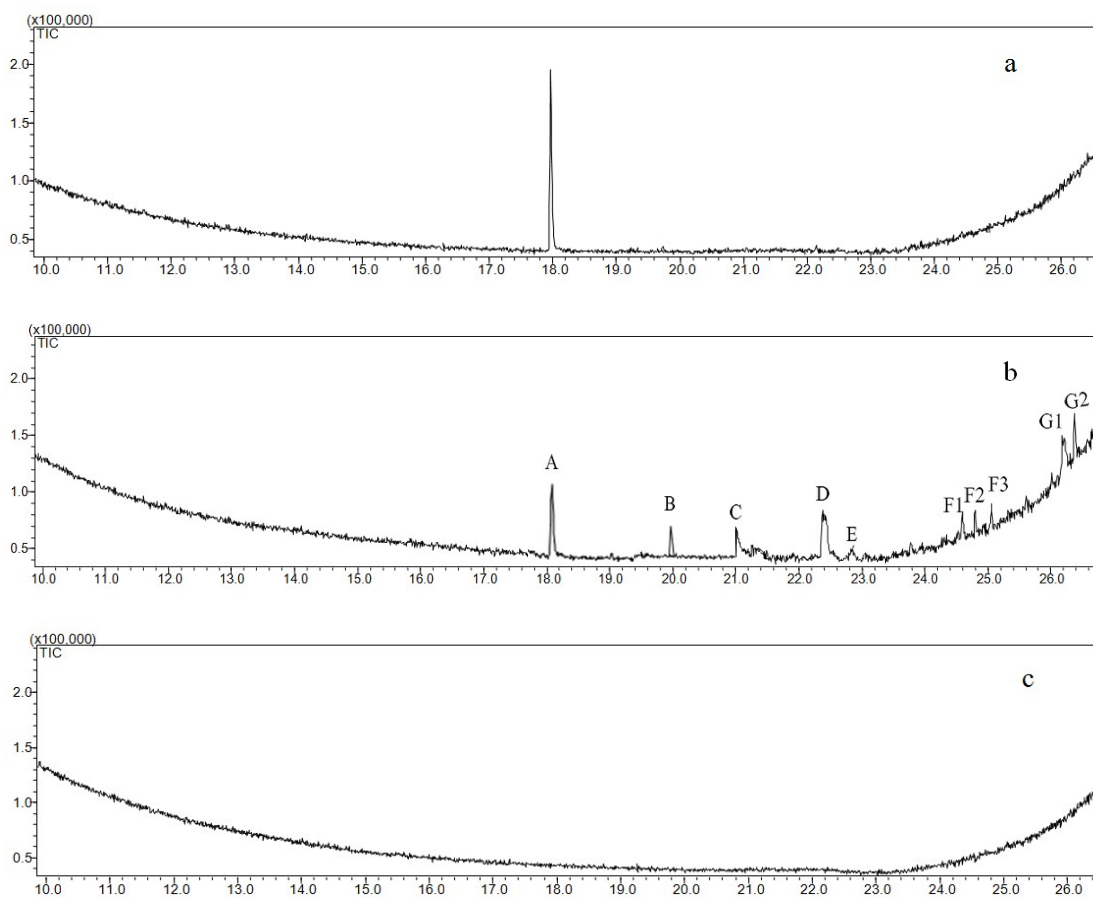

**Fig. S2** GC-MS chromatograms of extracts of phenanthrene degradation catalyzed by biosynthetic schwertmannite after (a) 0 h, (b) 1 h and (c) 5 h reaction time. Experimental conditions:  $[\text{phenanthrene}]_0 = 1 \text{ mg/L}$ ,  $[\text{H}_2\text{O}_2]_0 = 200 \text{ mg/L}$ , and solution initial  $\text{pH} = 3.0$ .

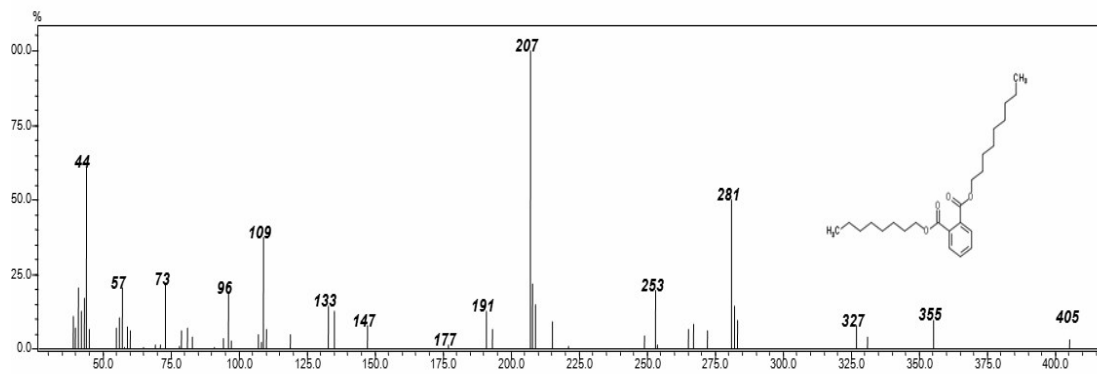

**Fig. S3** Mass spectra of Product G (retention time of 26.192 or 26.342 min,  $m/z = 405$ ).

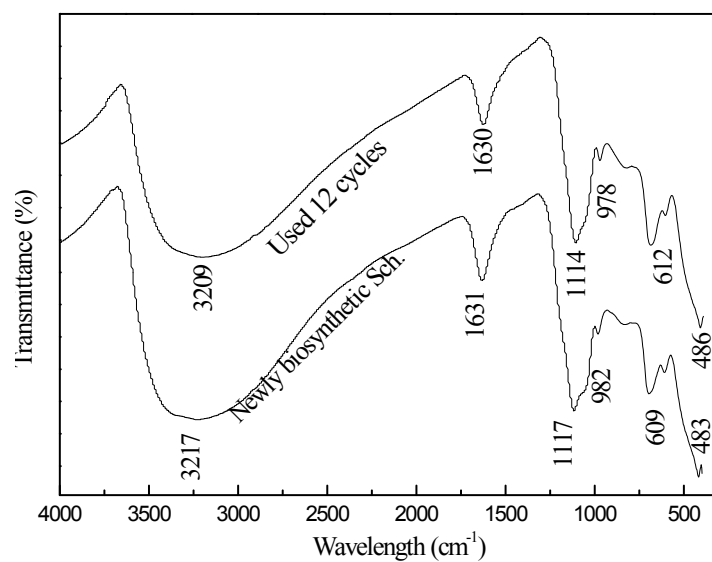

**Fig. S4** FTIR analyses of newly biosynthetic schwertmannite and the schwertmannite after being used for 12 cycles. Experimental conditions were  $[\text{phenanthrene}]_0 = 1 \text{ mg/L}$ ,  $[\text{schwertmannite}]_0 = 1 \text{ g/L}$ ,  $[\text{H}_2\text{O}_2]_0 = 200 \text{ mg/L}$ , solution initial pH = 3.0, and reaction time of 12 h in each cycle.

**Table S1** Binding energy of Fe 2p, and Fe<sup>2+</sup> and Fe<sup>3+</sup> surface concentration on the biosynthetic schwertmannite catalyst before and after phenanthrene degradation.

|        | Binding Energy (eV) |                   |                   |                   | Fe <sup>2+</sup> surface<br>concentration<br>(%) | Fe <sup>3+</sup> surface<br>concentration<br>(%) |
|--------|---------------------|-------------------|-------------------|-------------------|--------------------------------------------------|--------------------------------------------------|
|        | Fe <sup>2+</sup>    |                   | Fe <sup>3+</sup>  |                   |                                                  |                                                  |
|        | 2p <sub>1/2</sub>   | 2p <sub>1/3</sub> | 2p <sub>1/2</sub> | 2p <sub>1/3</sub> |                                                  |                                                  |
| Before | 710.9               | 724.4             | 712.5             | 726.1             | 41.8                                             | 58.2                                             |
| After  | 711.3               | 724.7             | 712.9             | 725.9             | 54.5                                             | 45.5                                             |
